# Supplementary material
Source: PubMed Central journal article supplement (PMC10482496)

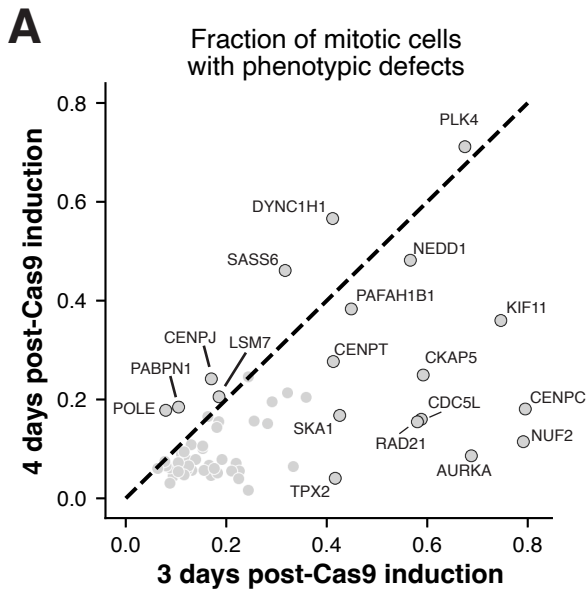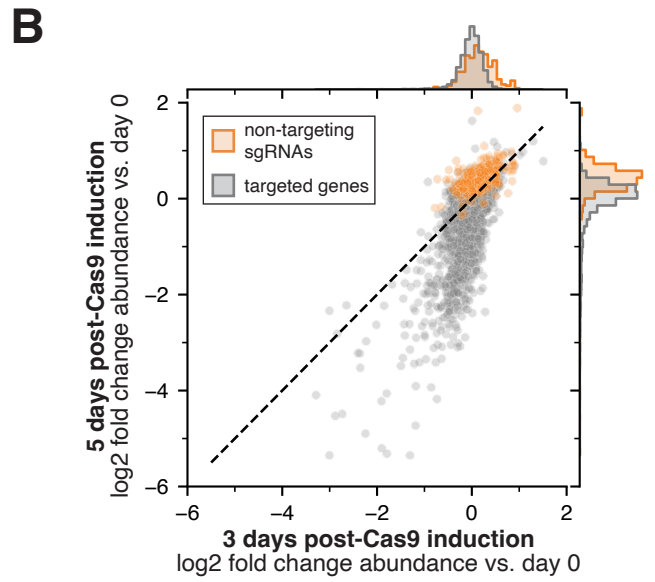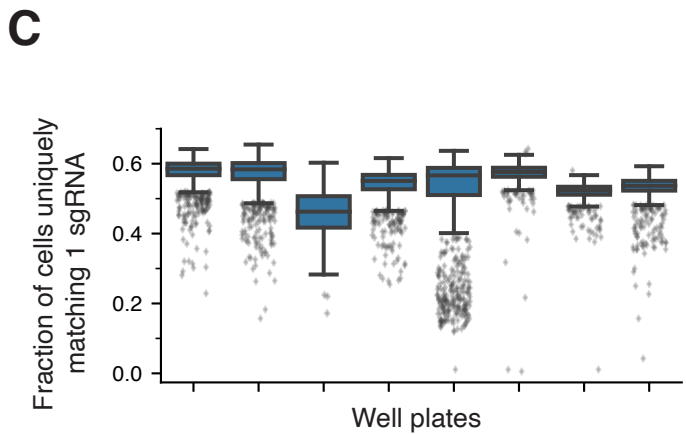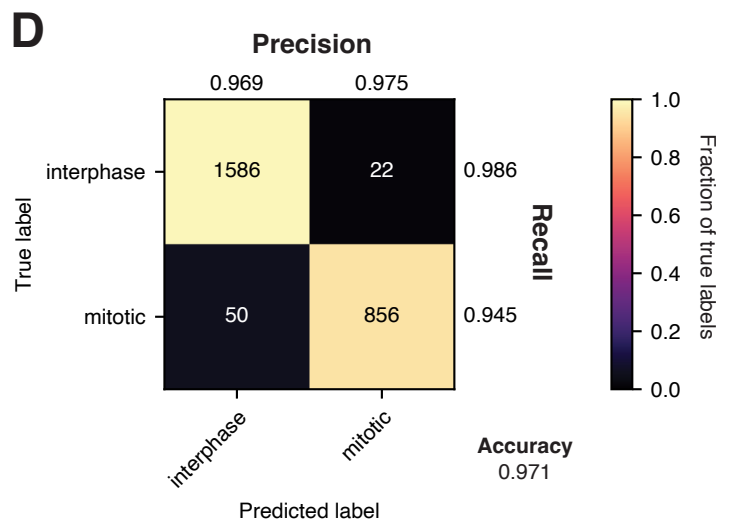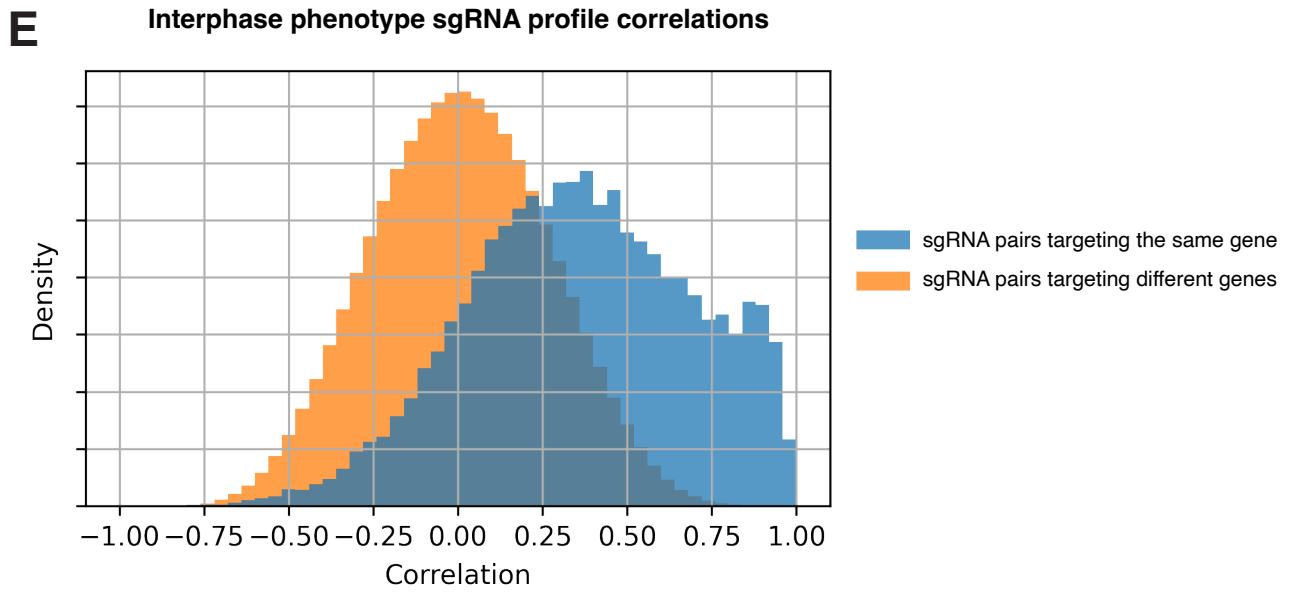

Supplement: NIHMS1924969-supplement-Supplemental_Figure_1.pdf [file NIHMS1924969-supplement-Supplemental_Figure_1.pdf]

**A**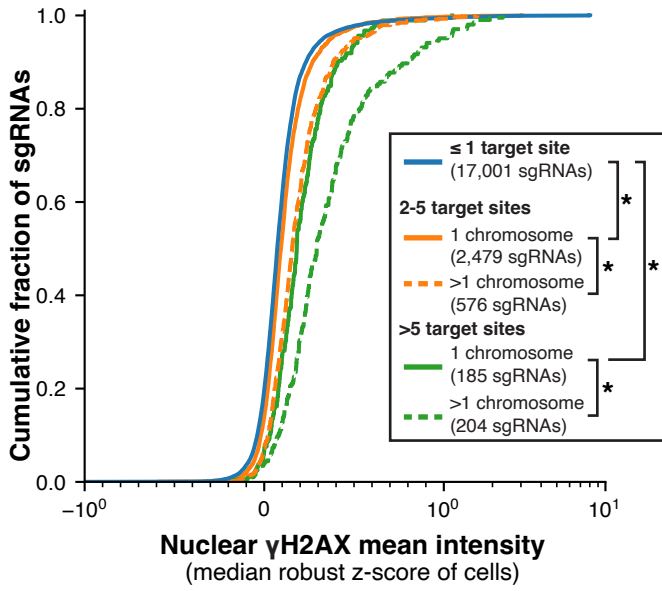**B**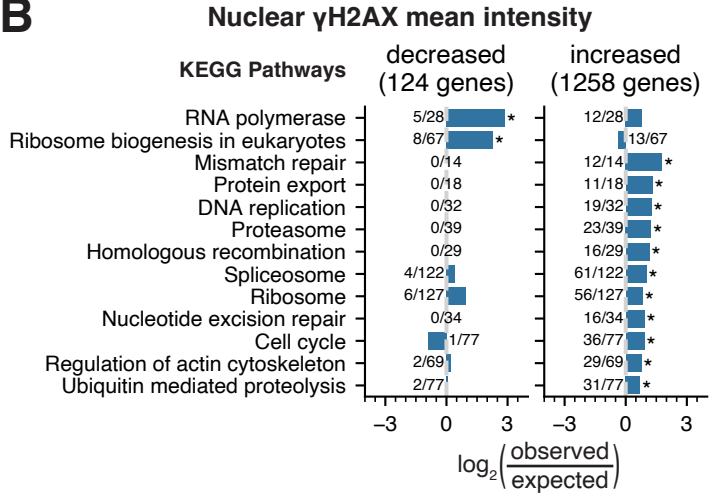**C**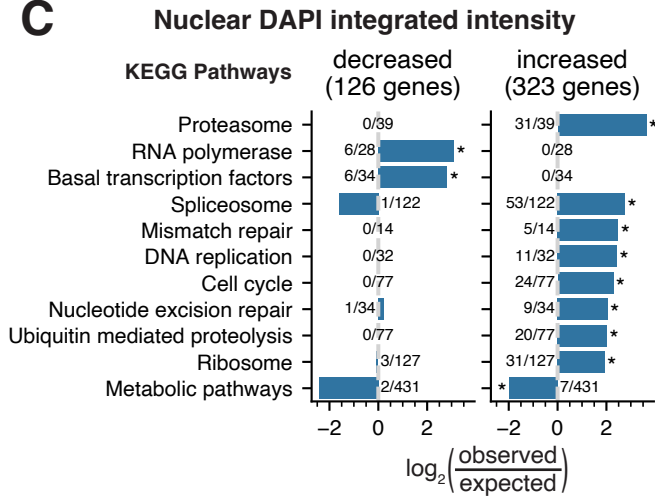**D**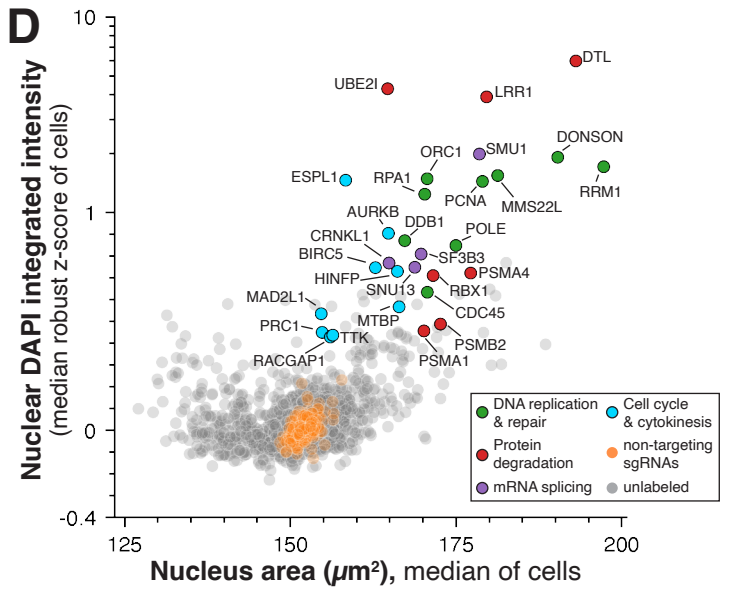**E**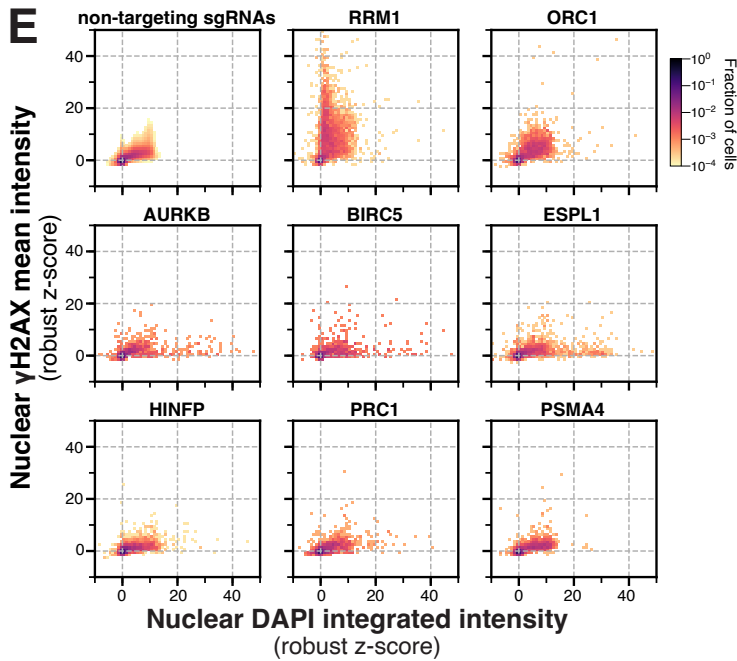

Supplement: NIHMS1924969-supplement-Supplemental_Figure_2.pdf [file NIHMS1924969-supplement-Supplemental_Figure_2.pdf]

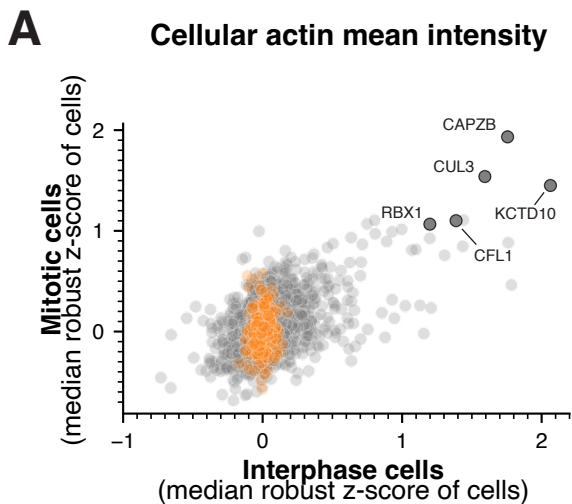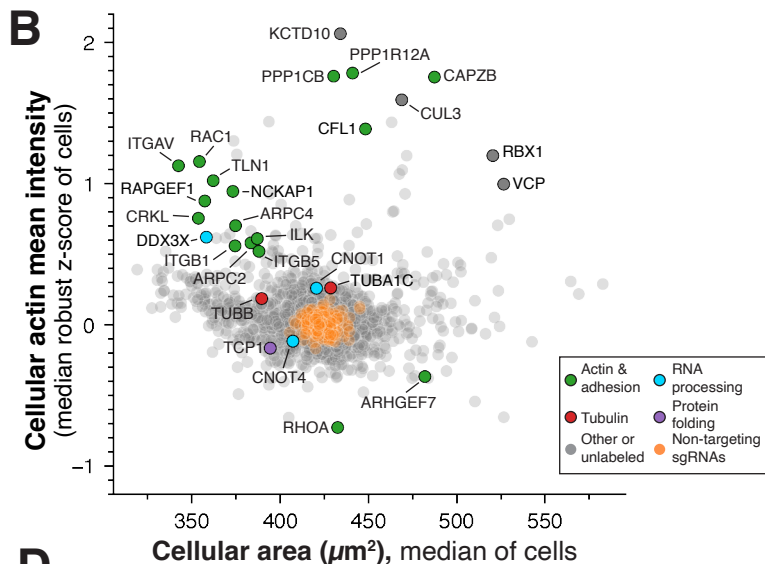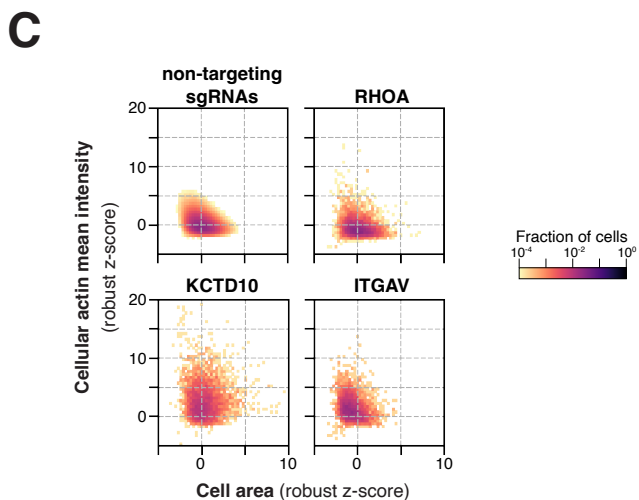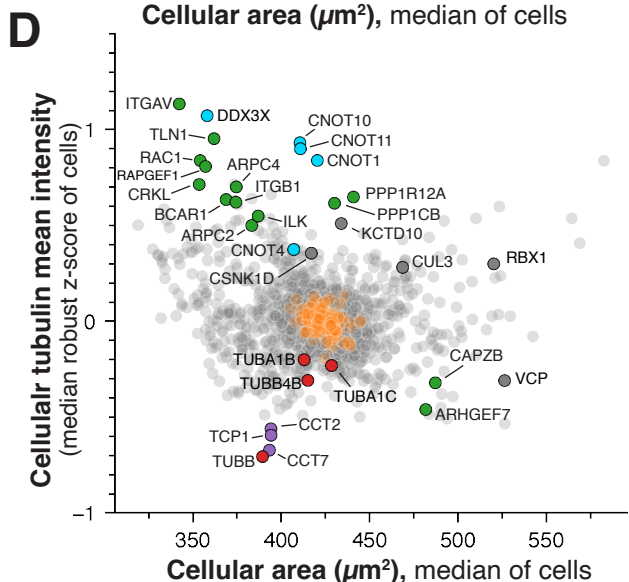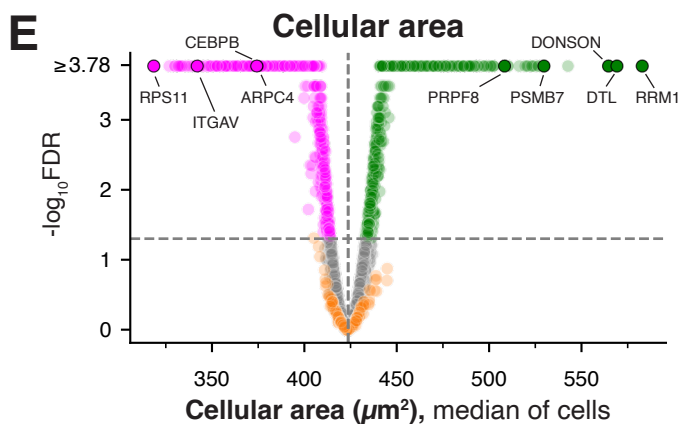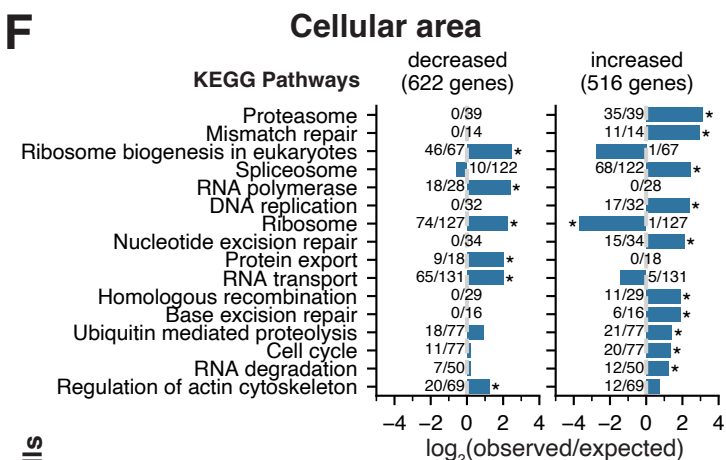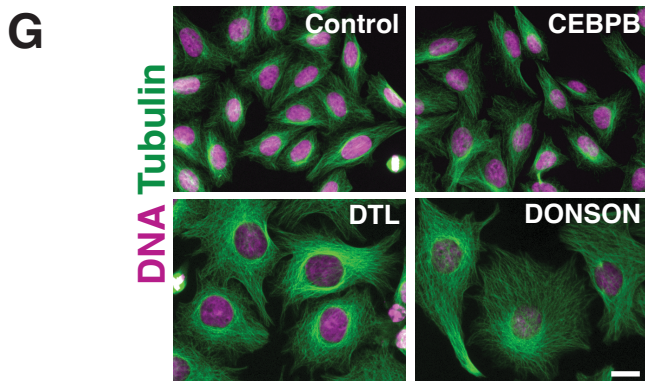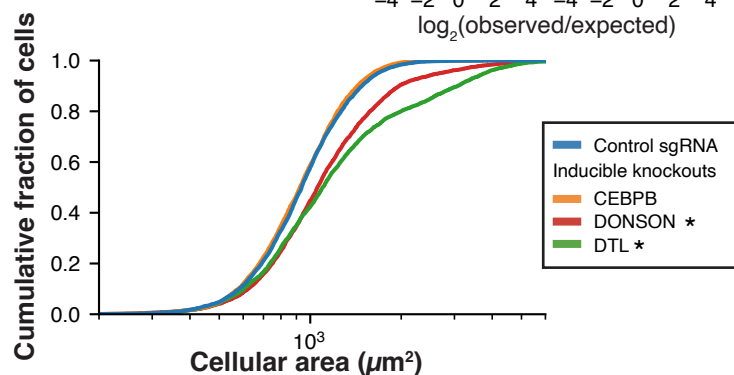

Supplement: NIHMS1924969-supplement-Supplemental_Figure_3.pdf [file NIHMS1924969-supplement-Supplemental_Figure_3.pdf]

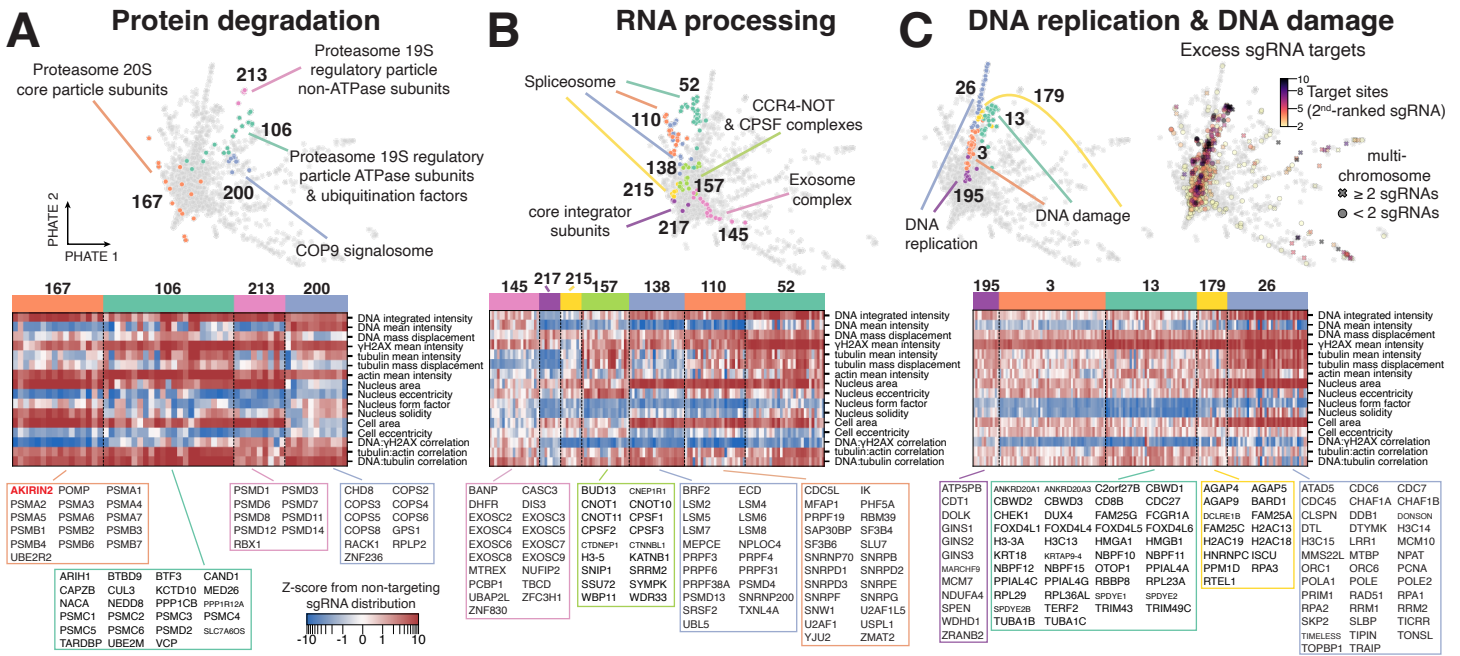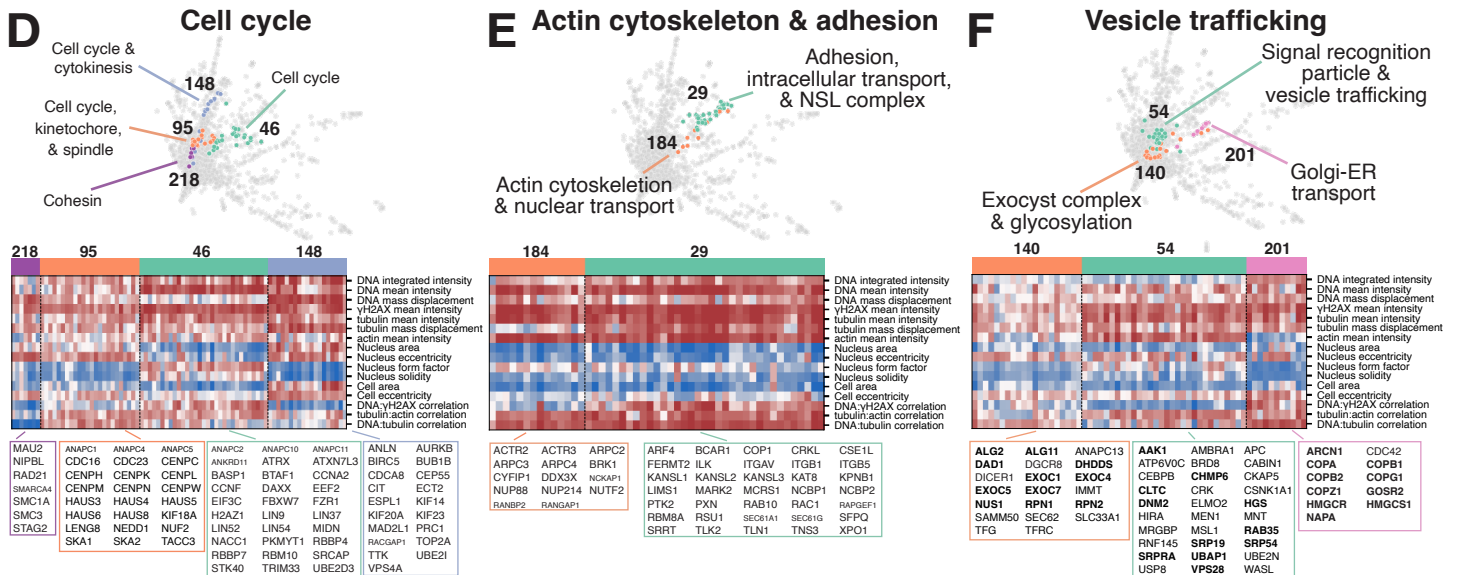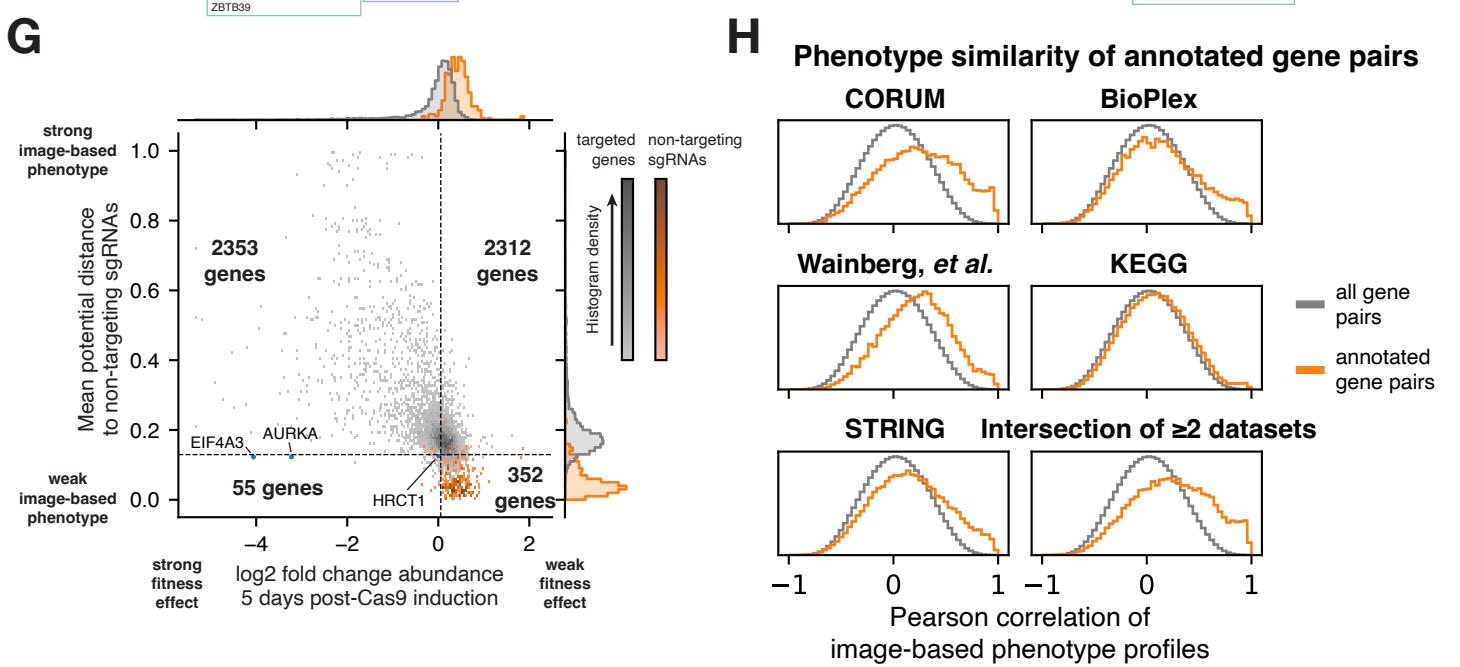

Supplement: NIHMS1924969-supplement-Supplemental_Figure_4.pdf [file NIHMS1924969-supplement-Supplemental_Figure_4.pdf]

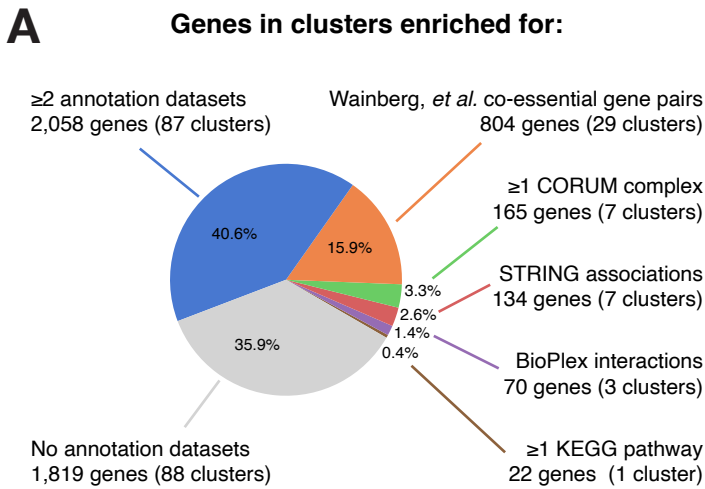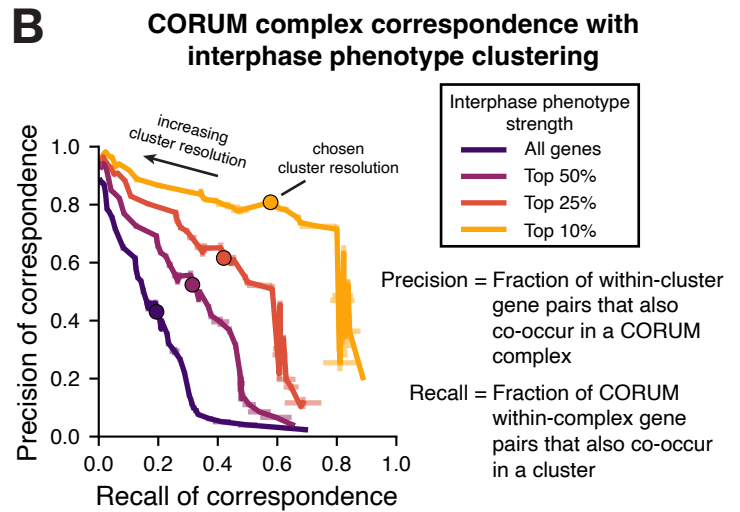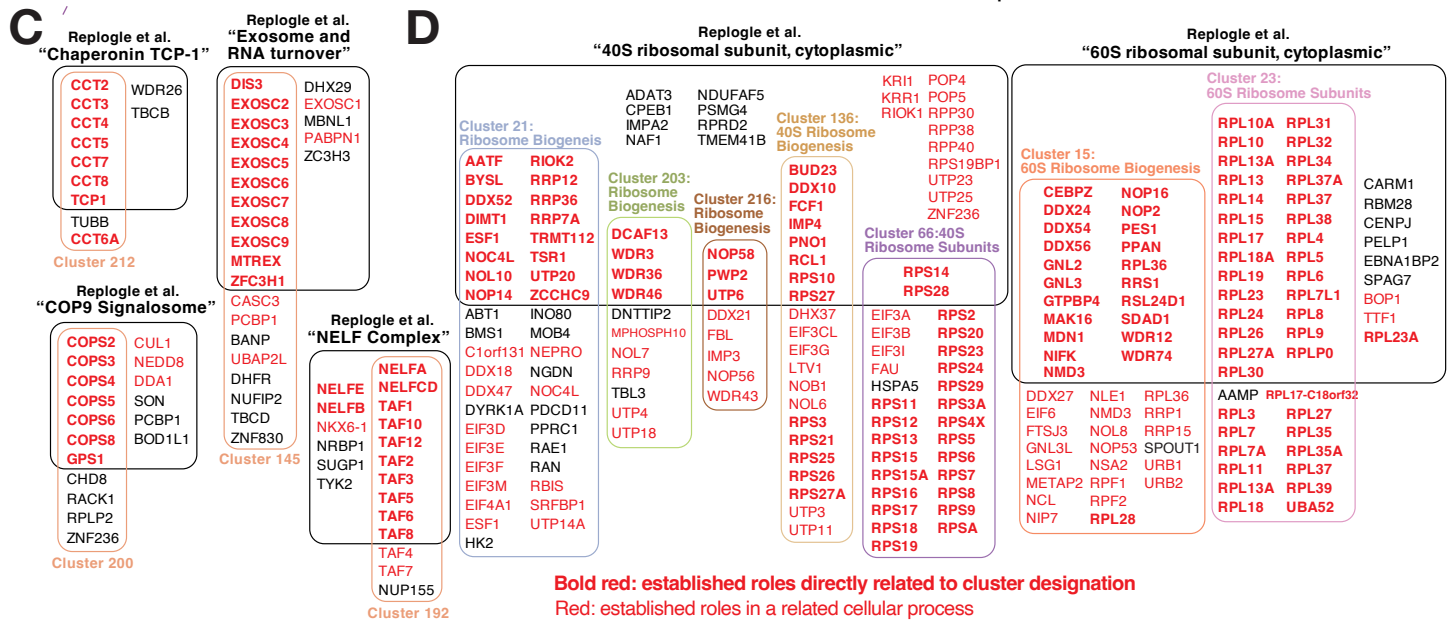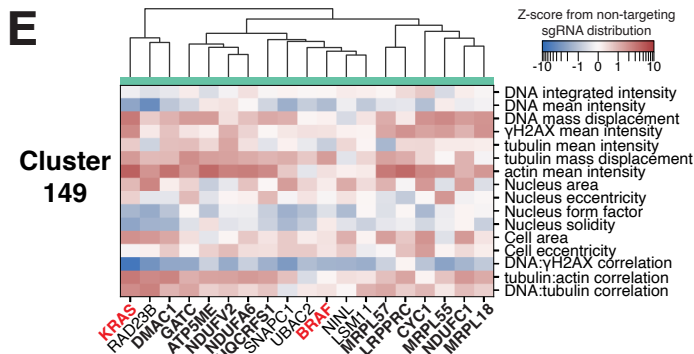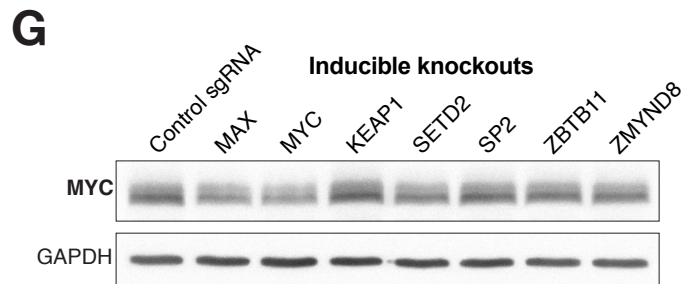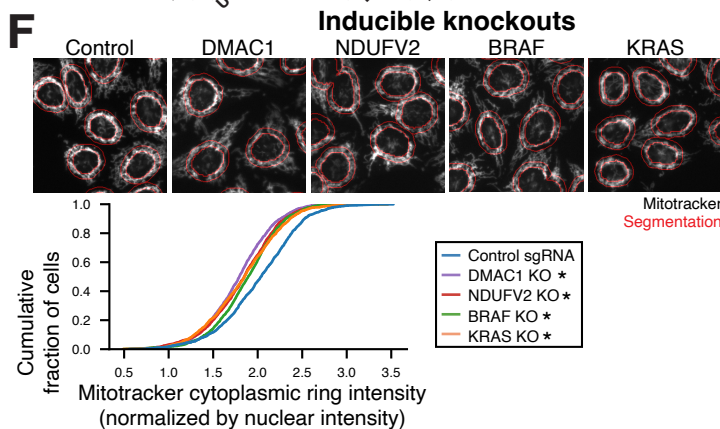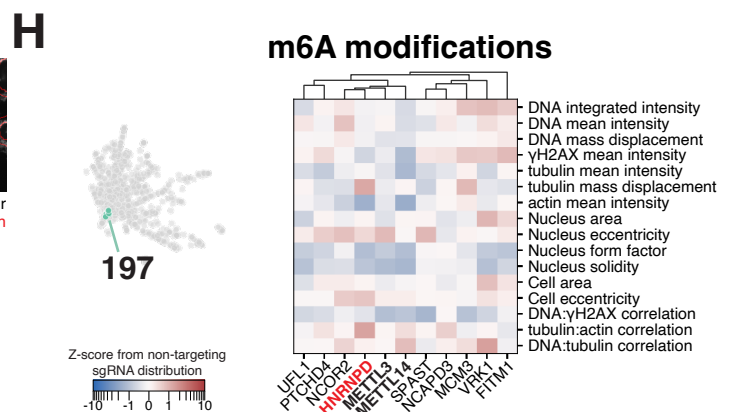

Supplement: NIHMS1924969-supplement-Supplemental_Figure_5.pdf [file NIHMS1924969-supplement-Supplemental_Figure_5.pdf]

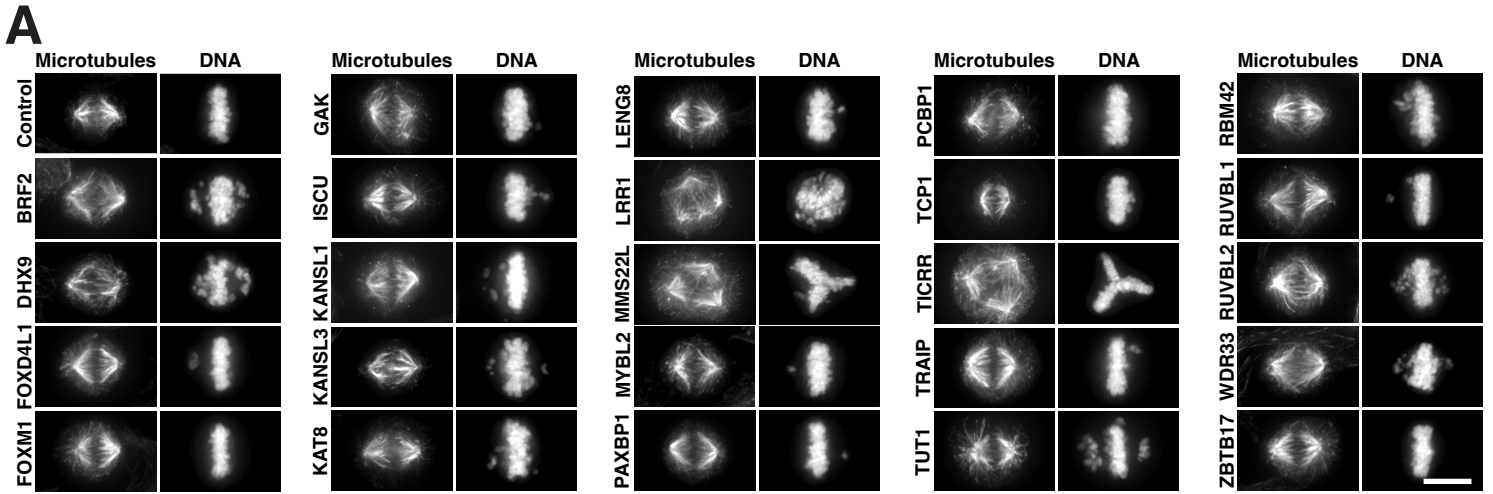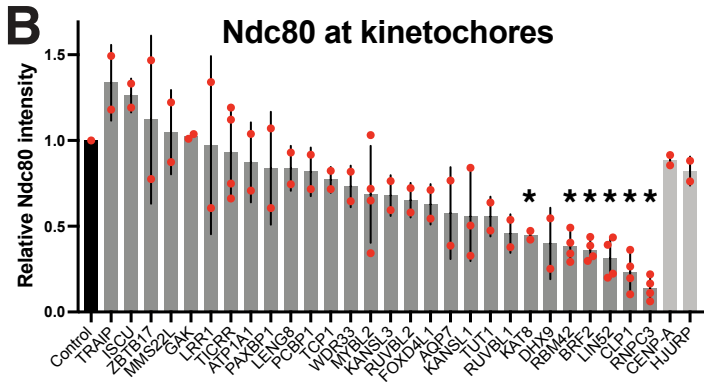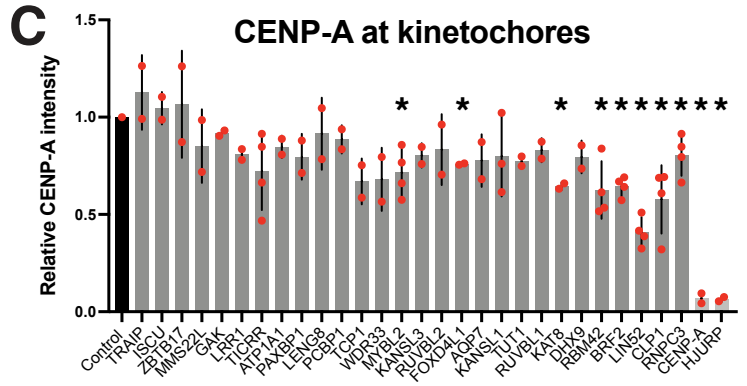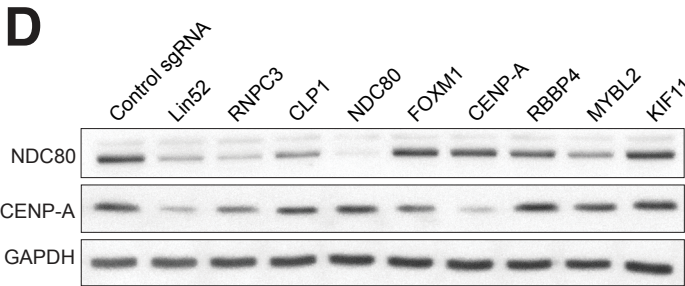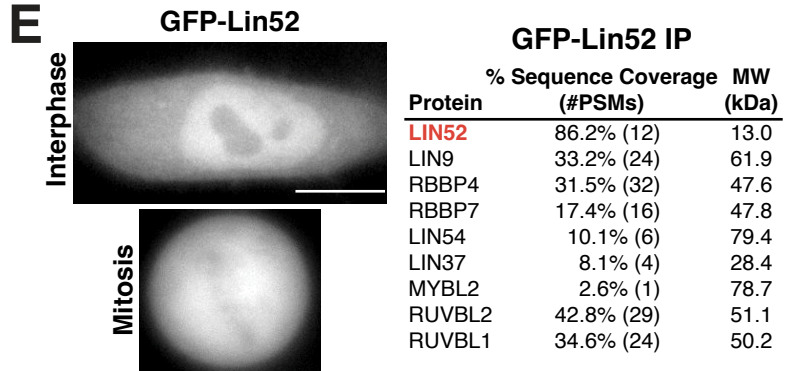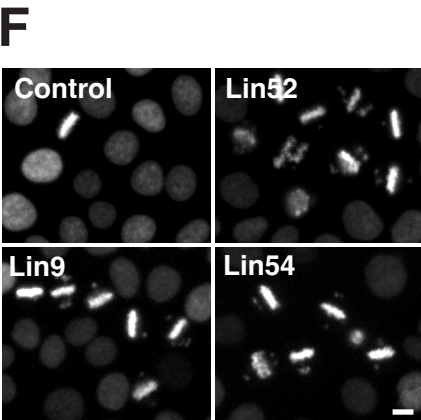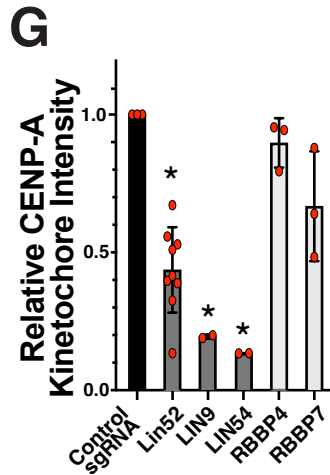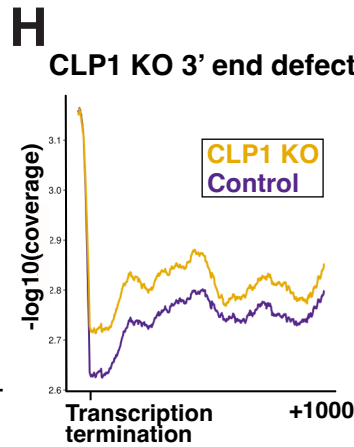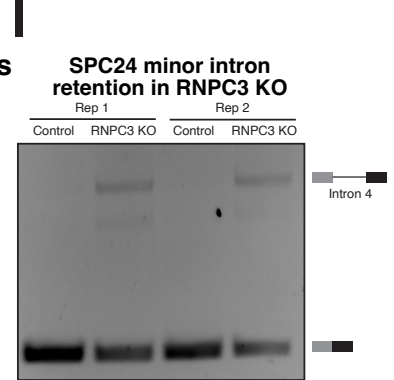

Supplement: NIHMS1924969-supplement-Supplemental_Figure_7.pdf [file NIHMS1924969-supplement-Supplemental_Figure_7.pdf]
